# Supplementary material for: Is the golden ratio a universal constant for self-replication?
Source: PubMed Central journal article supplement (PMC6047800; doi:10.1371/journal.pone.0200601), 2018-07-16
Supplement: pone.0200601.s001.pdf [file pone.0200601.s001.pdf]

## Supporting Information to:

Is the golden ratio a universal constant for self-replication?

Yu Liu<sup>#\*</sup>, David Sumpter

Department of Mathematics, Uppsala University, Uppsala, Sweden

<sup>#</sup> Current Address: Molecular Systems Biology, Groningen Biomolecular Sciences and Biotechnology Institute, University of Groningen, Groningen, the Netherlands

<sup>\*</sup> Corresponding author

E-mail: yu.ernest.liu@hotmail.com (YL)

## Supporting information

**S1 Appendix. Characteristic polynomial of a matrix.** The characteristic polynomial of an  $m \times m$  matrix  $\mathbf{A} = (a_{jk})$  is defined as [1]

$$\det(\lambda \mathbf{I} - \mathbf{A}) = \lambda^m - \sigma_1 \lambda^{m-1} + \sigma_2 \lambda^{m-2} - \dots + (-1)^m \sigma_m$$

where  $\mathbf{I}$  is the identity matrix and

$$\sigma_1 = \sum_{j=1}^m a_{jj} = \text{trace}(\mathbf{A})$$

is the sum of all first-order diagonal minors of  $\mathbf{A}$  (equivalently, the trace);

$$\sigma_2 = \sum_{j < k} \det \begin{pmatrix} a_{jj} & a_{jk} \\ a_{kj} & a_{kk} \end{pmatrix}$$

is the sum of all second-order diagonal minors of  $\mathbf{A}$ ;

$$\sigma_3 = \sum_{j < k < l} \det \begin{pmatrix} a_{jj} & a_{jk} & a_{jl} \\ a_{kj} & a_{kk} & a_{kl} \\ a_{lj} & a_{lk} & a_{ll} \end{pmatrix}$$

is the sum of all third-order diagonal minors of  $\mathbf{A}$ , and so forth. Finally,

$$\sigma_m = \det(\mathbf{A}).$$

## References

1. Liesen J, Mehrmann V. In: The Characteristic Polynomial and Eigenvalues of Matrices. Springer International Publishing; 2015. p. 101–113. doi: 10.1007/978-3-319-24346-7\_8.
